# Supplementary material
Source: Elsevier journal article supplement (https://comptes-rendus.academie-sciences.fr/geoscience/article/10.1016/j.crte.2017.12.001/file/attach/mmc1.pdf)
Supplement: mmc1 [file mmc1.pdf]

## Supplementary table

|                                            |                                                                                                             |
|--------------------------------------------|-------------------------------------------------------------------------------------------------------------|
| <b>Laboratory &amp; Sample Preparation</b> |                                                                                                             |
| Laboratory name                            | Géosciences Rennes, UMR CNRS 6118, Rennes, France                                                           |
| Sample type/mineral                        | Magmatic zircon                                                                                             |
| Sample preparation                         | Polished thin-sections                                                                                      |
| Imaging                                    | CITL (Cambridge Image Technology Ltd) Mk5 cold-cathode CL unit, University of Mons, Belgium                 |
| <b>Laser ablation system</b>               |                                                                                                             |
| Make, Model & type                         | ESI NWR193UC, Excimer                                                                                       |
| Ablation cell                              | ESI NWR TwoVol2                                                                                             |
| Laser wavelength                           | 193 nm                                                                                                      |
| Pulse width                                | < 5 ns                                                                                                      |
| Fluence                                    | 8 J/cm <sup>-2</sup>                                                                                        |
| Repetition rate                            | 3 Hz                                                                                                        |
| Spot size                                  | 20–30 μm                                                                                                    |
| Sampling mode / pattern                    | Single spot                                                                                                 |
| Carrier gas                                | 100% He, Ar make-up gas and N <sub>2</sub> (3 ml/mn) combined using in-house smoothing device               |
| Background collection                      | 20 s                                                                                                        |
| Ablation duration                          | 60 s                                                                                                        |
| Wash-out delay                             | 15 s                                                                                                        |
| Cell carrier gas flow (He)                 | 0.75 l/min                                                                                                  |
| <b>ICP-MS Instrument</b>                   |                                                                                                             |
| Make, Model & type                         | Agilent 7700x, Q-ICP-MS                                                                                     |
| Sample introduction                        | Via conventional tubing                                                                                     |
| RF power                                   | 1350 W                                                                                                      |
| Sampler, skimmer cones                     | Ni                                                                                                          |
| Extraction lenses                          | X type                                                                                                      |
| Make-up gas flow (Ar)                      | 0.85 l/min                                                                                                  |
| Detection system                           | Single collector secondary electron multiplier                                                              |
| Data acquisition protocol                  | Time-resolved analysis                                                                                      |
| Scanning mode                              | Peak hopping, one point per peak                                                                            |
| Detector mode                              | Pulse counting, dead time correction applied, and analog mode when signal intensity > ~ 10 <sup>6</sup> cps |

|                              |                                                                                                                             |
|------------------------------|-----------------------------------------------------------------------------------------------------------------------------|
| Masses measured              | $^{204}\text{(Hg + Pb)}$ , $^{206}\text{Pb}$ , $^{207}\text{Pb}$ , $^{208}\text{Pb}$ , $^{232}\text{Th}$ , $^{238}\text{U}$ |
| Integration time per peak    | 10–30 ms                                                                                                                    |
| Sensitivity / Efficiency     | 28,000 cps/ppm Pb (50 $\mu\text{m}$ , 10Hz)                                                                                 |
| <b>Data Processing</b>       |                                                                                                                             |
| Gas blank                    | 20 seconds on-peak                                                                                                          |
| Calibration strategy         | GJ1 zircon standard used as primary reference material, Plešovice used as secondary reference material (quality control)    |
| Reference Material info      | GJ1 (Jackson et al., 2004)<br>Plešovice (Slama et al., 2008)                                                                |
| Data processing package used | GLITTER ® (van Achterbergh et al., 2001)                                                                                    |
| Quality control / Validation | Plešovice: concordia age = $337.4 \pm 2.9$ Ma ( $N = 8$ ; MSWD=0.19)                                                        |

Supplementary Table 1

| <b>Magmatic minerals</b>  | <b>MMG1</b> | <b>MMG2</b> | <b>MMG3</b> | <b>MS1</b> | <b>MS2</b> | <b>MS3</b> |
|---------------------------|-------------|-------------|-------------|------------|------------|------------|
| <i>Phenocrysts</i>        |             |             |             |            |            |            |
| Qtz                       | xxx         | xxx         | xxx         | xxx        | xxx        | xxx        |
| Kfs                       | xxx         | xxx         | xxx         | xxx        | xxx        | xxx        |
| Pl                        | xx          | xx          | xx          | xxx        | xx         | xx         |
| <i>Groundmass</i>         |             |             |             |            |            |            |
| Qtz                       | xx          | xx          | xx          | xxx        | xxx        | xxx        |
| Kfs                       | xx          | xx          | xx          | xx         | xx         | xx         |
| Pl                        | xx          | xx          | xx          | xx         | xx         | xx         |
| Bt                        | x           | x           | x           | xxx        | x          | x          |
| Ms                        | xx          | xx          | x           | xx         | x          | x          |
| <i>Accessories</i>        |             |             |             |            |            |            |
| Apatite                   | x           | x           | xx          | x          | xx         | x          |
| Zircon                    | xx          | x           | x           | x          | x          | -          |
| <b>Secondary minerals</b> |             |             |             |            |            |            |
| Qtz                       | x           | x           | x           | x          | xxx        | xxx        |
| Chl                       | xxx         | xx          | xxx         | xx         | -          | -          |
| Carbonate                 | xxx         | xxx         | -           | xx         | -          | x          |
| Iron oxides               | xx          | x           | xxx         | x          | -          | -          |
| Sulfide                   | x           | x           | xx          | -          | x          | x          |

xxx= Abundant

xx = Common

x= Rare

- = not observed

Supplementary Table 2

|                                    | MMG1   | MMG2   | MMG3   | MS1    | MS2    | MS3    |
|------------------------------------|--------|--------|--------|--------|--------|--------|
| (%)                                |        |        |        |        |        |        |
| SiO <sub>2</sub>                   | 66.70  | 70.53  | 67.87  | 70.07  | 74.72  | 77.64  |
| Al <sub>2</sub> O <sub>3</sub>     | 14.55  | 14.40  | 13.87  | 13.39  | 13.71  | 12.75  |
| Fe <sub>2</sub> O <sub>3</sub> tot | 5.24   | 4.06   | 6.97   | 4.21   | 2.31   | 1.37   |
| MnO                                | 0.08   | 0.05   | 0.11   | 0.07   | 0.06   | 0.02   |
| MgO                                | 1.67   | 1.31   | 2.00   | 1.24   | 0.93   | 0.33   |
| CaO                                | 2.34   | 1.03   | 0.70   | 2.14   | 0.42   | 0.32   |
| Na <sub>2</sub> O                  | 4.09   | 4.73   | 4.54   | 3.70   | 6.55   | 6.57   |
| K <sub>2</sub> O                   | 1.72   | 1.27   | 0.69   | 2.79   | 0.25   | 0.68   |
| TiO <sub>2</sub>                   | 0.62   | 0.78   | 1.12   | 0.58   | 0.23   | 0.12   |
| P <sub>2</sub> O <sub>5</sub>      | 0.17   | 0.14   | 0.20   | 0.17   | 0.17   | 0.17   |
| LOI                                | 3.21   | 1.86   | 2.19   | 1.43   | 1.39   | 0.64   |
| Total                              | 100.37 | 100.14 | 100.26 | 99.77  | 100.74 | 100.62 |
| (ppm)                              |        |        |        |        |        |        |
| La                                 | 24.60  | 19.54  | 12.61  | 26.59  | 9.70   | 5.68   |
| Ce                                 | 54.27  | 40.26  | 28.38  | 59.32  | 22.73  | 13.96  |
| Pr                                 | 6.64   | 4.99   | 3.57   | 7.29   | 2.81   | 1.88   |
| Nd                                 | 25.17  | 20.08  | 13.90  | 27.42  | 10.35  | 7.20   |
| Sm                                 | 5.97   | 5.24   | 3.43   | 6.60   | 2.87   | 2.46   |
| Eu                                 | 1.27   | 1.15   | 0.59   | 1.21   | 0.42   | 0.24   |
| Gd                                 | 6.06   | 6.15   | 3.50   | 6.37   | 2.89   | 2.42   |
| Dy                                 | 7.81   | 8.90   | 5.15   | 7.62   | 4.29   | 3.98   |
| Ho                                 | 1.78   | 2.03   | 1.21   | 1.64   | 0.93   | 0.87   |
| Er                                 | 4.89   | 5.47   | 3.50   | 4.39   | 2.63   | 2.47   |
| Tm                                 | 0.72   | 0.78   | 0.57   | 0.66   | 0.44   | 0.44   |
| Yb                                 | 4.69   | 4.98   | 3.74   | 4.33   | 3.20   | 3.14   |
| Lu                                 | 0.64   | 0.70   | 0.54   | 0.61   | 0.45   | 0.44   |
| LaN/YbN                            | 3.54   | 2.65   | 2.28   | 4.15   | 2.05   | 1.22   |
| Eu/Eu*                             | 0.21   | 0.20   | 0.17   | 0.19   | 0.14   | 0.10   |
| SumREE                             | 144.51 | 120.25 | 80.69  | 154.05 | 63.70  | 45.17  |
| (ppm)                              |        |        |        |        |        |        |
| Rb                                 | 56.21  | 28.48  | 28.10  | 80.47  | 11.36  | 45.06  |
| Ba                                 | 458.70 | 418.70 | 242.60 | 386.10 | 45.03  | 28.69  |
| W                                  | 1.14   | 1.34   | 1.03   | 1.36   | 1.65   | 1.45   |
| Th                                 | 13.43  | 16.11  | 11.04  | 12.50  | 7.17   | 7.16   |
| U                                  | 3.16   | 3.73   | 2.77   | 2.83   | 4.97   | 6.03   |
| Nb                                 | 12.14  | 13.21  | 14.32  | 10.94  | 11.60  | 12.97  |
| Ta                                 | 1.20   | 1.36   | 1.36   | 1.15   | 1.96   | 2.41   |
| Pb                                 | 26.38  | 6.64   | 7.34   | 15.09  | 17.52  | 5.92   |
| Sr                                 | 166.20 | 125.30 | 119.80 | 133.10 | 59.57  | 67.08  |
| Zr                                 | 184.90 | 201.20 | 186.80 | 155.70 | 74.51  | 62.41  |
| Hf                                 | 5.22   | 5.72   | 5.22   | 4.72   | 2.74   | 2.53   |
| Y                                  | 49.45  | 56.25  | 32.30  | 43.99  | 24.41  | 23.39  |
| Nb/Ta                              | 10.10  | 9.70   | 10.54  | 9.55   | 5.39   | 5.91   |
| Zr/Hf                              | 35.43  | 35.16  | 35.76  | 32.99  | 24.66  | 27.22  |
| A/CNK                              | 1.13   | 1.31   | 1.46   | 1.03   | 1.05   | 1.16   |
| A/NK                               | 1.69   | 1.57   | 1.69   | 1.47   | 1.10   | 1.24   |

Supplementary Table 3

| Sample                                              | MMG1     | MMG2     | MMG3     | MS1      | MS2      | MS3      |
|-----------------------------------------------------|----------|----------|----------|----------|----------|----------|
| Rb (ppm)                                            | 56.2     | 28.5     | 28.1     | 80.5     | 11.4     | 45.1     |
| Sr (ppm)                                            | 166.2    | 125.3    | 119.8    | 133.1    | 59.6     | 67.1     |
| $^{87}\text{Rb}/^{86}\text{Sr}$                     | 0.98     | 0.66     | 0.68     | 1.75     | 0.55     | 1.95     |
| $^{87}\text{Sr}/^{86}\text{Sr}$                     | 0.720018 | 0.718582 | 0.719396 | 0.722112 | 0.719422 | 0.726686 |
| error                                               | 0.000010 | 0.000012 | 0.000010 | 0.000009 | 0.000011 | 0.000010 |
| $(^{87}\text{Sr}/^{86}\text{Sr})_{420\text{ Ma}}$   | 0.7142   | 0.7146   | 0.7153   | 0.7116   | 0.7161   | 0.7150   |
| Sm (ppm)                                            | 5.4      | 4.7      | 3.1      | 6.3      | 2.6      | 2.1      |
| Nd (ppm)                                            | 23.8     | 18.6     | 13.5     | 28.0     | 9.3      | 6.7      |
| $^{147}\text{Sm}/^{144}\text{Nd}$                   | 0.137108 | 0.151741 | 0.140046 | 0.134935 | 0.166921 | 0.191124 |
| $^{143}\text{Nd}/^{144}\text{Nd}$                   | 0.512231 | 0.512183 | 0.512214 | 0.512229 | 0.512355 | 0.512385 |
| error                                               | 0.000005 | 0.000005 | 0.000005 | 0.000005 | 0.000005 | 0.000005 |
| $(^{143}\text{Nd}/^{144}\text{Nd})_{420\text{ Ma}}$ | 0.511854 | 0.511766 | 0.511829 | 0.511858 | 0.511896 | 0.511859 |
| $\epsilon\text{Nd}_{420\text{ Ma}}$                 | -4.8     | -6.5     | -5.2     | -4.7     | -3.9     | -4.6     |
| $T_{\text{DM}}$ (Ma)                                | 1824     | 2639     | 1931     | 1777     | 5094     | 2577     |

Supplementary Table 4

| Analysis_#           | Pb ppm Uppm Th/U |       |        | ISOTOPIC RATIOS |        |         |        | AGES (Ma)   |        |            |              |            | Conc. % |      |              |
|----------------------|------------------|-------|--------|-----------------|--------|---------|--------|-------------|--------|------------|--------------|------------|---------|------|--------------|
|                      |                  |       |        | 238/206         | err%   | 207/206 | err%   | 207Pb/206Pb | err    | 206Pb/238U | err          | 207Pb/235U |         | err  |              |
| <b>Sample MMG1-a</b> |                  |       |        |                 |        |         |        |             |        |            |              |            |         |      |              |
| 5060415a             | Zr1a             | 20.7  | 215.4  | 0.13            | 14.728 | 1.3     | 0.0546 | 2.3         | 397.0  | 51.0       | <b>423.5</b> | <b>5.3</b> | 419.4   | 8.3  | <b>101.0</b> |
| 6060415a             | Zr1b             | 16.3  | 171.5  | 0.18            | 15.076 | 1.4     | 0.0568 | 2.6         | 482.8  | 56.0       | <b>414.0</b> | <b>5.5</b> | 424.7   | 9.2  | <b>97.5</b>  |
| 7060415a             | Zr1c             | 16.6  | 164.2  | 0.32            | 14.723 | 1.4     | 0.0564 | 2.0         | 468.0  | 44.9       | <b>423.6</b> | <b>5.5</b> | 430.7   | 7.5  | <b>98.4</b>  |
| 8060415a             | Zr1d             | 21.1  | 189.2  | 0.73            | 14.782 | 1.3     | 0.0558 | 2.2         | 442.4  | 48.6       | <b>422.0</b> | <b>5.4</b> | 425.2   | 8.1  | <b>99.2</b>  |
| 9060415a             | Zr1e             | 21.9  | 228.7  | 0.12            | 14.594 | 1.3     | 0.0553 | 1.9         | 423.6  | 41.4       | <b>427.2</b> | <b>5.4</b> | 426.7   | 7.1  | <b>100.1</b> |
| 11060415a            | Zr2              | 13.6  | 124.7  | 0.58            | 14.658 | 1.3     | 0.0585 | 1.6         | 546.7  | 35.5       | <b>425.4</b> | <b>5.5</b> | 444.9   | 6.4  | <b>95.6</b>  |
| 12060415a            | Zr3              | 72.5  | 795.1  | 0.13            | 15.113 | 1.3     | 0.0561 | 1.5         | 454.8  | 32.3       | <b>413.0</b> | <b>5.2</b> | 419.5   | 5.7  | <b>98.5</b>  |
| 13060415a            | Zr4a             | 56.8  | 606.6  | 0.07            | 14.674 | 1.3     | 0.0562 | 1.5         | 458.8  | 31.7       | <b>425.0</b> | <b>5.3</b> | 430.4   | 5.8  | <b>98.7</b>  |
| 14060415a            | Zr4b             | 41.2  | 368.1  | 1.17            | 15.513 | 1.3     | 0.0586 | 1.5         | 551.7  | 33.1       | 402.7        | 5.2        | 425.7   | 5.9  | 94.6         |
| 6060415b             | Zr12             | 39.6  | 400.2  | 0.14            | 15.119 | 1.2     | 0.0563 | 1.5         | 461.8  | 34.1       | <b>412.9</b> | <b>4.8</b> | 420.4   | 5.7  | <b>98.2</b>  |
| 7060415b             | Zr13             | 65.4  | 512.5  | 1.01            | 14.910 | 1.2     | 0.0600 | 1.3         | 604.5  | 28.4       | 418.5        | 4.9        | 448.3   | 5.3  | 93.4         |
| 14060415b            | Zr14             | 147.6 | 1477.4 | 0.34            | 14.835 | 1.2     | 0.0602 | 1.4         | 609.9  | 31.0       | 420.5        | 5.0        | 451.0   | 5.8  | 93.2         |
| <b>Sample MMG1-b</b> |                  |       |        |                 |        |         |        |             |        |            |              |            |         |      |              |
| 20060415a            | Zr6              | 60.1  | 210.7  | 0.42            | 5.581  | 1.3     | 0.1193 | 1.5         | 1945.6 | 26.5       | 1062.5       | 12.9       | 1394.3  | 12.8 | 71.7         |
| 22060415a            | Zr8a             | 132.5 | 1479.0 | 0.06            | 15.133 | 1.3     | 0.0557 | 1.5         | 439.9  | 32.9       | <b>412.5</b> | <b>5.3</b> | 416.9   | 5.8  | <b>98.9</b>  |
| 23060415a            | Zr8b             | 80.8  | 879.3  | 0.07            | 14.762 | 1.3     | 0.0554 | 1.6         | 426.3  | 33.7       | <b>422.6</b> | <b>5.4</b> | 423.3   | 6.0  | <b>99.8</b>  |
| 8060415b             | Zr15a            | 53.0  | 691.1  | 0.28            | 19.489 | 1.2     | 0.0578 | 1.4         | 523.3  | 30.1       | 322.6        | 3.8        | 348.2   | 4.4  | 92.6         |
| 9060415b             | Zr15b            | 36.3  | 365.1  | 0.16            | 14.879 | 1.2     | 0.0556 | 1.5         | 437.2  | 31.5       | <b>419.3</b> | <b>4.9</b> | 422.0   | 5.4  | <b>99.4</b>  |
| 10060415b            | Zr16             | 159.3 | 448.0  | 0.24            | 8.113  | 1.2     | 0.2327 | 1.3         | 3070.7 | 20.5       | 749.3        | 8.6        | 1624.8  | 11.6 | 52.9         |
| <b>Sample MMG2-b</b> |                  |       |        |                 |        |         |        |             |        |            |              |            |         |      |              |
| 24060415a            | Zr9              | 116.2 | 1266.0 | 0.06            | 14.734 | 1.3     | 0.0559 | 1.5         | 446.1  | 33.6       | <b>423.3</b> | <b>5.4</b> | 427.0   | 6.1  | <b>99.1</b>  |
| 25060415a            | Zr10             | 21.5  | 218.9  | 0.26            | 14.810 | 1.4     | 0.0565 | 1.8         | 472.8  | 38.6       | <b>421.2</b> | <b>5.5</b> | 429.6   | 6.7  | <b>98.0</b>  |
| 26060415a            | Zr11a            | 26.9  | 284.6  | 0.19            | 14.943 | 1.3     | 0.0573 | 1.7         | 501.8  | 37.1       | <b>417.6</b> | <b>5.5</b> | 431.0   | 6.6  | <b>96.9</b>  |
| 27060415a            | Zr11b            | 17.3  | 180.1  | 0.17            | 14.596 | 1.4     | 0.0581 | 1.8         | 532.3  | 40.0       | <b>427.2</b> | <b>5.7</b> | 444.3   | 7.1  | <b>96.2</b>  |
| 11060415b            | Zr17             | 66.2  | 683.5  | 1.44            | 15.432 | 1.2     | 0.0613 | 1.4         | 651.3  | 29.9       | 404.7        | 4.8        | 443.7   | 5.5  | 91.2         |
| 12060415b            | Zr18a            | 45.5  | 408.2  | 0.51            | 14.863 | 1.2     | 0.0578 | 1.5         | 522.8  | 33.1       | <b>419.8</b> | <b>5.0</b> | 436.0   | 5.8  | <b>96.3</b>  |
| 13060415b            | Zr18b            | 27.6  | 256.5  | 0.40            | 14.780 | 1.2     | 0.0589 | 1.6         | 561.6  | 35.0       | <b>422.0</b> | <b>5.0</b> | 444.3   | 6.2  | <b>95.0</b>  |

Highlighted in green : data used for concordia calculation (97-103 % concordance)

In bold : data used for 206Pb/238U age calculation (95-105 % concordance)

Supplementary Table 5

| Analysis_#          | Pb ppm Uppm Th/U |        |        | ISOTOPIC RATIOS |        |         |        | AGES (Ma)   |        |            |              |            | conc. % |      |              |
|---------------------|------------------|--------|--------|-----------------|--------|---------|--------|-------------|--------|------------|--------------|------------|---------|------|--------------|
|                     |                  |        |        | 238/206         | err%   | 207/206 | err%   | 207Pb/206Pb | err    | 206Pb/238U | err          | 207Pb/235U |         | err  |              |
| <b>Sample MS1-1</b> |                  |        |        |                 |        |         |        |             |        |            |              |            |         |      |              |
| 6070415             | Zr1b             | 16.0   | 164.6  | 0.37            | 14.863 | 1.2     | 0.0563 | 1.6         | 463.1  | 36.1       | <b>419.8</b> | <b>5.0</b> | 426.6   | 6.0  | <b>98.4</b>  |
| 7070415             | Zr2              | 21.6   | 214.2  | 0.16            | 14.879 | 1.2     | 0.0570 | 1.5         | 490.0  | 32.2       | <b>419.3</b> | <b>4.9</b> | 430.4   | 5.5  | <b>97.4</b>  |
| 8070415             | Zr3a             | 27.6   | 256.6  | 0.39            | 14.986 | 1.2     | 0.0575 | 1.4         | 512.1  | 29.7       | <b>416.4</b> | <b>4.9</b> | 431.4   | 5.3  | <b>96.5</b>  |
| 9070415             | Zr3b             | 28.6   | 267.2  | 0.34            | 14.832 | 1.2     | 0.0562 | 1.4         | 458.8  | 30.6       | <b>420.6</b> | <b>4.9</b> | 426.6   | 5.3  | <b>98.6</b>  |
| 18070415            | Zr7a             | 34.9   | 337.2  | 0.21            | 14.607 | 1.2     | 0.0556 | 1.4         | 436.3  | 30.7       | <b>426.9</b> | <b>5.0</b> | 428.4   | 5.4  | <b>99.6</b>  |
| 20070415            | Zr8a             | 704.9  | 1048.3 | 0.44            | 2.632  | 1.2     | 0.1811 | 1.2         | 2662.9 | 19.4       | 2075.7       | 21.3       | 2386.0  | 12.2 | 89.6         |
| 21070415            | Zr8b             | 1421.3 | 1558.9 | 0.62            | 2.021  | 1.2     | 0.1931 | 1.2         | 2768.8 | 19.3       | 2591.9       | 25.6       | 2692.4  | 12.6 | 97.2         |
| <b>Sample MS1-2</b> |                  |        |        |                 |        |         |        |             |        |            |              |            |         |      |              |
| 12070415            | Zr5a             | 5.8    | 49.2   | 0.70            | 14.674 | 1.3     | 0.0532 | 2.8         | 335.6  | 62.7       | <b>425.0</b> | <b>5.3</b> | 411.4   | 9.6  | <b>103.3</b> |
| 13070415            | Zr5b             | 64.5   | 663.0  | 0.07            | 14.923 | 1.2     | 0.0568 | 1.2         | 481.5  | 27.3       | <b>418.1</b> | <b>4.9</b> | 428.1   | 4.8  | <b>97.7</b>  |
| 14070415            | Zr6              | 50.8   | 500.7  | 1.06            | 15.385 | 1.2     | 0.0565 | 1.3         | 472.3  | 29.8       | <b>406.0</b> | <b>4.7</b> | 416.1   | 5.0  | <b>97.6</b>  |
| 22070415            | Zr9a             | 24.4   | 258.1  | 0.07            | 15.389 | 1.2     | 0.0579 | 1.5         | 524.2  | 32.0       | <b>405.8</b> | <b>4.8</b> | 424.0   | 5.5  | <b>95.7</b>  |
| 23070415            | Zr9b             | 19.7   | 199.3  | 0.08            | 14.723 | 1.2     | 0.0546 | 1.5         | 396.4  | 34.0       | <b>423.6</b> | <b>5.0</b> | 419.4   | 5.7  | <b>101.0</b> |
| 24070415            | Zr10a            | 99.9   | 1028.6 | 0.06            | 14.839 | 1.2     | 0.0555 | 1.3         | 431.2  | 28.6       | <b>420.4</b> | <b>4.9</b> | 422.1   | 5.0  | <b>99.6</b>  |
| 25070415            | Zr10b            | 115.7  | 604.2  | 0.01            | 7.511  | 1.2     | 0.0690 | 1.3         | 898.7  | 26.1       | 805.7        | 9.1        | 830.8   | 8.0  | 97.0         |
| 26070415            | Zr10c            | 123.0  | 674.6  | 0.04            | 7.950  | 1.2     | 0.0687 | 1.3         | 889.2  | 26.3       | 763.8        | 8.7        | 796.5   | 7.8  | 95.9         |
| <b>Sample MS2-1</b> |                  |        |        |                 |        |         |        |             |        |            |              |            |         |      |              |
| 10070415            | Zr4              | 20.8   | 211.9  | 0.08            | 14.837 | 1.2     | 0.0571 | 1.5         | 493.4  | 32.6       | <b>420.4</b> | <b>4.9</b> | 431.9   | 5.6  | <b>97.3</b>  |
| 27070415            | Zr11             | 62.0   | 611.5  | 0.13            | 14.699 | 1.2     | 0.0554 | 1.4         | 427.0  | 30.0       | <b>424.3</b> | <b>5.0</b> | 424.7   | 5.2  | <b>99.9</b>  |

Highlighted in green : data used for concordia calculation (97-103 % concordance)

In bold : data used for 206Pb/238U age calculation (95-105 % concordance)

Supplementary Table 6
